# Supplementary material for: Tuning Mechanical Properties of Polymeric Hydrogels Using Orthogonally Functionalized Crosslinkers
Source: Hindawi journal article supplement (doi:10.1155/2022/2150591), 2022-08-24
Supplement: f1 [file 2150591.f1.zip]

Archive with 2 entries (2 files):
- Graphical Abstract Image.pdf
- Xlinker Ehanced Hydrogel_SI_APT (1).doc
