# Supplementary figures and images for: Tuning Mechanical Properties of Polymeric Hydrogels Using Orthogonally Functionalized Crosslinkers
Source: Hindawi journal article supplement (doi:10.1155/2022/2150591), 2022-08-24

## GRAPHICAL ABSTRACT

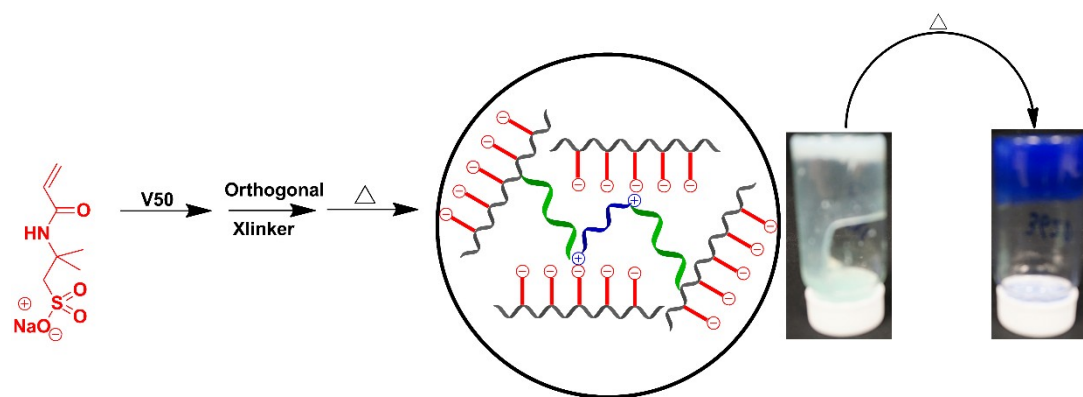

Supplement: f1 [file 2150591.f1.zip › Graphical Abstract Image.pdf]
